# Supplementary material
Source: publisher site journal article supplement (https://www.dovepress.com/article/164210)

## **Supplementary**

### **Incidental thyroid carcinoma in surgery-treated hyperthyroid**

#### **patients with Graves' disease: a systematic review and meta-analysis of cohort studies**

Qingyi Jia<sup>1#</sup>, MD, Xiaodan Li<sup>2#</sup>, MD, Ying Liu<sup>3#</sup>, MM, Ling Li<sup>4</sup>, PhD, Joey SW Kwong<sup>4</sup>, MD, Kaiyun Ren<sup>1</sup>, MM, Yong Jiang<sup>5</sup>, MD, Xin Sun<sup>4</sup>, PhD, Haoming Tian<sup>1\*</sup>, MM, Sheyu Li<sup>1\*</sup>, MD

### **Database information & Search Strategy**

Electronic database was used in the literature searching, including EMBASE and PubMed. Last search was updated to January 23, 2018. The combination of the keywords was used as follow:

PubMed: (hyperthyroidism OR Graves OR autoimmune thyroid disease OR toxic diffuse goiter OR toxic and diffuse goiter with hyperthyroidism) AND (thyroid cancer OR thyroid carcinoma). The Medical Subject Heading (MeSH) was also used during search when available.

EMBASE:

1. hyperthyroidism/
2. Graves disease/
3. autoimmune thyroid disease.mp.
4. toxic diffuse goiter.mp.
5. (toxic and diffuse goiter with hyperthyroidism).mp. [mp=title, abstract, heading word, drug trade name, original title, device manufacturer, drug manufacturer, device trade name, keyword, floating subheading]
6. thyroid cancer/
7. thyroid carcinoma/
8. 6 or 7
9. 1 or 2 or 3 or 4 or 5
10. 8 and 9

**Table S1 Definition of hyperthyroidism, GD, Indication for surgery of included studies**

| <b>Articles</b>         | <b>Definition of hyperthyroidism</b>                                                                  | <b>Definition of GD</b>                     | <b>Indication for thyroidectomy</b>       | <b>Type of thyroidectomy (total: subtotal)</b> |
|-------------------------|-------------------------------------------------------------------------------------------------------|---------------------------------------------|-------------------------------------------|------------------------------------------------|
| <b>Wahl (1982)</b>      | Not mentioned.                                                                                        | Not mentioned.                              | Hyperthyroidism patients undergo surgery. | Not available.                                 |
| <b>Ruggieri (1999)</b>  | Evaluation of T3, T4, FT3, FT4, TG, and TSH level. US, Tc 99 or 131I thyroid scanning were evaluated. | Not mentioned<br>TPOAb, TgAb was evaluated. | Hyperthyroidism patients undergo surgery. | 16: 66                                         |
| <b>Terzioglu (1993)</b> | Clinical features and physical examination.                                                           | Not mentioned                               | Hyperthyroidism patients undergo surgery. | Not available.                                 |

| Articles              | Definition of hyperthyroidism | Definition of GD | Indication for thyroidectomy                                                                                                           | Type of thyroidectomy<br>(total: subtotal) |
|-----------------------|-------------------------------|------------------|----------------------------------------------------------------------------------------------------------------------------------------|--------------------------------------------|
| <b>Ocak S (2014)</b>  | Not mentioned.                | Not mentioned    | Hyperthyroidism patients undergo surgery.                                                                                              | 25: 152                                    |
| <b>Linos (1997)</b>   | Not mentioned.                | Not mentioned    | Hyperthyroidism patients undergo surgery.                                                                                              | 25: 375                                    |
| <b>Pradeep (2007)</b> | Not mentioned.                | Not mentioned    | Hyperthyroidism patients undergo surgery.<br><br>GD patients:<br><br>1) Relapse after ATD therapy<br><br>2) Persistent hyperthyroidism | 93: 205                                    |

| Articles | Definition of hyperthyroidism | Definition of GD | Indication for thyroidectomy                                                                                                                                                                                                                                                      | Type of thyroidectomy<br>(total: subtotal) |
|----------|-------------------------------|------------------|-----------------------------------------------------------------------------------------------------------------------------------------------------------------------------------------------------------------------------------------------------------------------------------|--------------------------------------------|
|          |                               |                  | <ul style="list-style-type: none"> <li>3) Large goiter (grades II and III)</li> <li>4) Allergic reactions to thionamides</li> <li>5) Drug noncompliance</li> <li>6) Nodule</li> <li>7) Eye disease (infiltrative ophthalmopathy)</li> <li>8) Pregnancy current/planned</li> </ul> |                                            |

| Articles                     | Definition of hyperthyroidism | Definition of GD                                           | Indication for thyroidectomy                                                                                         | Type of thyroidectomy<br>(total: subtotal) |
|------------------------------|-------------------------------|------------------------------------------------------------|----------------------------------------------------------------------------------------------------------------------|--------------------------------------------|
|                              |                               |                                                            | For Toxic MNG& AFTN ptients:<br><br>1) Retrosternal extension<br><br>2) Compressive symptoms<br><br>3) Large goiter. |                                            |
| <b>Mittendorf<br/>(2001)</b> | Evaluation of FT4, TSH level. | Not mentioned.<br><br>Presence of ophthalmopathy was noted | 1) Hyperthyroidism patients undergo surgery.<br><br>2) Massive thyroid enlargement with compression symptoms         | 9: 45                                      |

| Articles             | Definition of hyperthyroidism | Definition of GD                                                                    | Indication for thyroidectomy                                                                                                                                | Type of thyroidectomy<br>(total: subtotal) |
|----------------------|-------------------------------|-------------------------------------------------------------------------------------|-------------------------------------------------------------------------------------------------------------------------------------------------------------|--------------------------------------------|
|                      |                               |                                                                                     | 3) A dominant nodule<br>4) Patient preference<br>5) Failure of radioiodine treatment<br>6) Concerns about radioiodine-induced aggravation of ophthalmopathy |                                            |
| <b>Dobyns (1974)</b> | Not mentioned.                | 1) Diagnosed or treated at the first time at the clinic<br>2) Presence of eye signs | Not mentioned.                                                                                                                                              | Not available.                             |

| Articles              | Definition of hyperthyroidism                                               | Definition of GD | Indication for thyroidectomy                                                                                                           | Type of thyroidectomy (total: subtotal) |
|-----------------------|-----------------------------------------------------------------------------|------------------|----------------------------------------------------------------------------------------------------------------------------------------|-----------------------------------------|
| <b>Zanella (2001)</b> | Evaluation of TT3, TT4, and TSH level. 131I thyroid scan and US evaluation. | Not mentioned    | Patients with hyperthyroidism.                                                                                                         | Not available.                          |
| <b>Quérat (2015)</b>  | Not mentioned.                                                              | Not mentioned    | 1) Desire for pregnancy.<br>2) Carbimazole-induced agranulocytosis<br>3) Compressive signs<br>4) Suspect cytology<br>5) Ophthalmopathy | 35: 165                                 |
| <b>Kunjumbame</b>     | Not mentioned.                                                              | Not mentioned    | Patients with hyperthyroidism.                                                                                                         | Not available.                          |



| Articles | Definition of hyperthyroidism | Definition of GD | Indication for thyroidectomy                                               | Type of thyroidectomy<br>(total: subtotal) |
|----------|-------------------------------|------------------|----------------------------------------------------------------------------|--------------------------------------------|
| d (2015) |                               |                  | Exclusion: non-toxic goiter or Hashimoto's thyroiditis with thyroid cancer |                                            |

ABBREVIATION: ATD: antithyroid drug therapy; T3: triiodothyronine; T4: thyroxine; FT3: free triiodothyronine; FT4: free thyroxine; TSH: thyroid stimulating hormone; TG: thyroglobulin; TgAb: anti-thyroglobulin antibody; TPOAb: anti-peroxides antibody; US: ultrasonography.

**Table S2 Histological classification of the included studies.**

| <b>Articles</b>          | <b>Histological definition of thyroid cancer</b> | <b>Histological classification</b>                                                                                            |
|--------------------------|--------------------------------------------------|-------------------------------------------------------------------------------------------------------------------------------|
| <b>Wahl (1982)</b>       | Not mentioned.                                   | Papillary carcinoma, Follicular carcinoma, Undifferentiated carcinoma                                                         |
| <b>Ruggieri (1999)</b>   | Not mentioned.                                   | Papillary carcinoma, Follicular carcinoma, Medullary carcinoma                                                                |
| <b>Terzioglu (1993)</b>  | Not mentioned.                                   | Papillary carcinoma, Follicular carcinoma                                                                                     |
| <b>Ocak S (2014)</b>     | Not mentioned.                                   | Papillary carcinoma, Follicular carcinoma                                                                                     |
| <b>Linos (1997)</b>      | Not mentioned.                                   | Papillary carcinoma, Follicular carcinoma, Medullary carcinoma                                                                |
| <b>Pradeep (2007)</b>    | Not mentioned.                                   | Papillary carcinoma, Follicular carcinoma, Medullary carcinoma                                                                |
| <b>Mittendorf (2001)</b> | Not mentioned.                                   | Papillary carcinoma, Follicular carcinoma, incidental occult microscopic papillary carcinoma, incidental medullary carcinoma, |

| <b>Articles</b>           | <b>Histological definition of thyroid cancer</b>                              | <b>Histological classification</b>                                                                                                                                                  |
|---------------------------|-------------------------------------------------------------------------------|-------------------------------------------------------------------------------------------------------------------------------------------------------------------------------------|
| <b>Dobyns (1974)</b>      | Not mentioned.                                                                | Follicular carcinoma, Papillary carcinoma, Mixed papillary carcinoma & Follicular carcinoma, Adenocarcinoma, Embryonal carcinoma, Carcinoma simplex, “Cancer”, Anaplastic carcinoma |
| <b>Zanella (2001)</b>     | According to the standard approach published by Rosai and WHO classification. | Papillary carcinoma, Hürthle cell malignant lesion, Follicular thyroid carcinoma                                                                                                    |
| <b>Quérat (2015)</b>      | Not mentioned.                                                                | Papillary carcinoma                                                                                                                                                                 |
| <b>Kunjumbamed (2015)</b> | Not mentioned.                                                                | Papillary carcinoma, Follicular variant of papillary thyroid cancer                                                                                                                 |



**Fig. S1 Subgroup analysis**

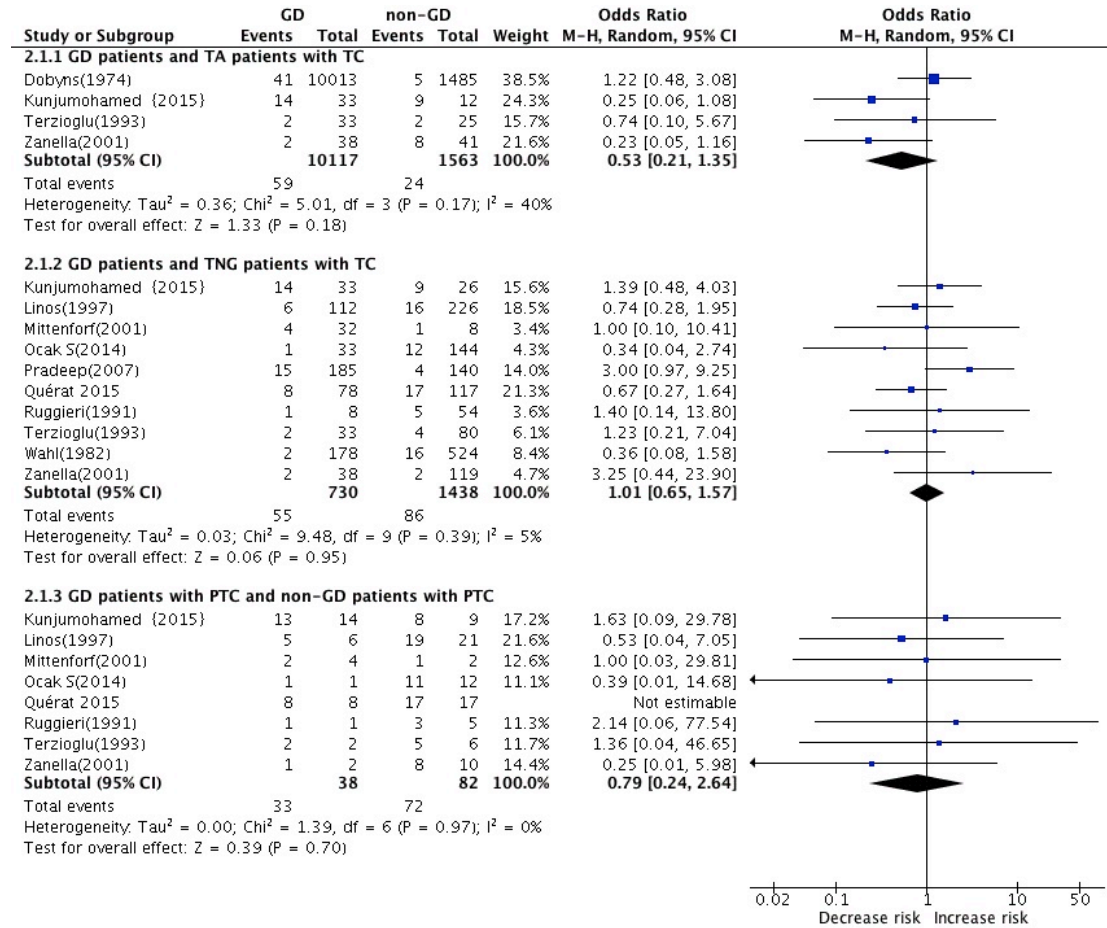

**Fig. S2 Publication Bias**

**S2.1 Funnel plot**

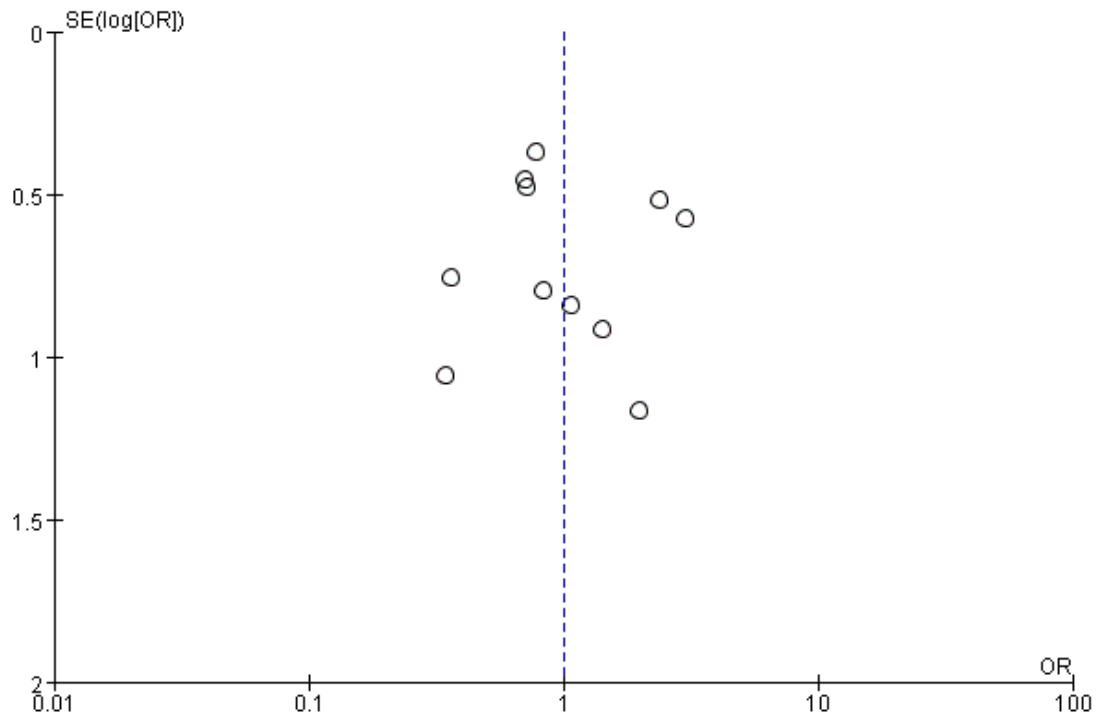

### S2.2 Begg's test

```

Begg's Test

adj. Kendall's Score (P-Q) =    13
  Std. Dev. of Score =    12.85
  Number of Studies =     11
           z =     1.01
  Pr > |z| =     0.312
           z =     0.93 (continuity corrected)
  Pr > |z| =     0.350 (continuity corrected)

```

### S2.3 Egger's test

Egger's test

| Std_Eff | Coef.     | Std. Err. | t     | P> t  | [95% Conf. Interval] |          |
|---------|-----------|-----------|-------|-------|----------------------|----------|
| slope   | -.1991965 | .6232603  | -0.32 | 0.757 | -1.609109            | 1.210716 |
| bias    | .328923   | 1.111371  | 0.30  | 0.774 | -2.185174            | 2.84302  |

Fig. S3 Sensitivity analysis

### S3.1 Remove-one sensitivity analysis

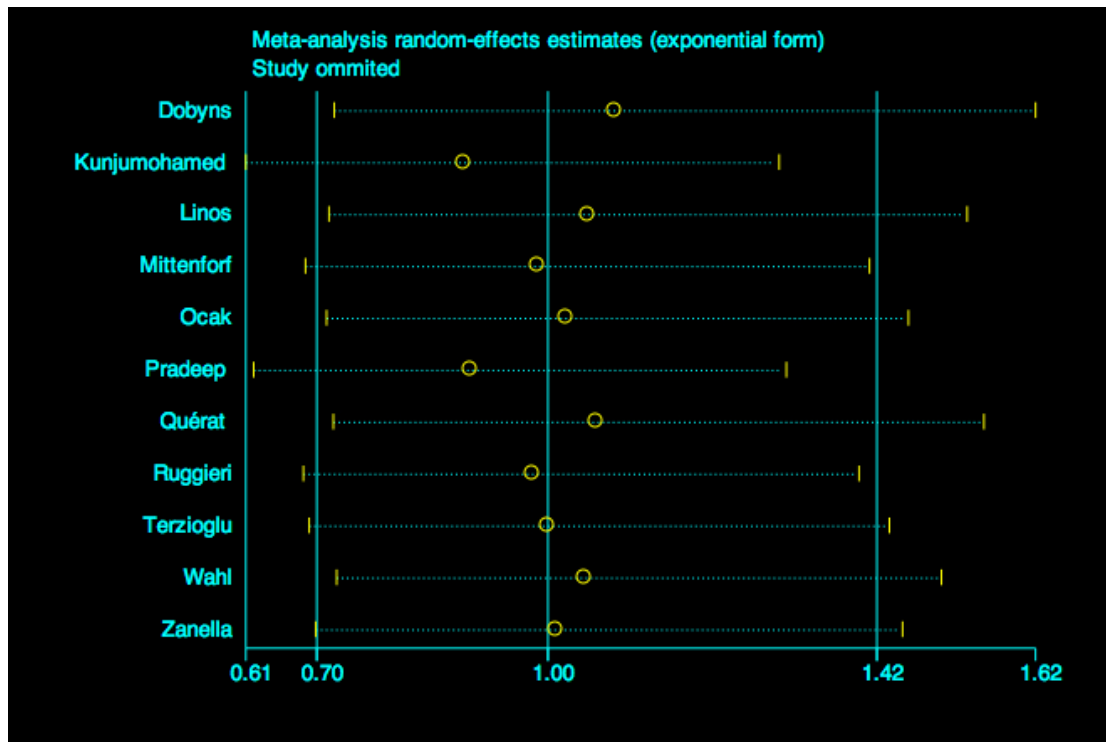

### S3.2 Sensitivity analysis excluding studies with unclearly defined hyperthyroidism

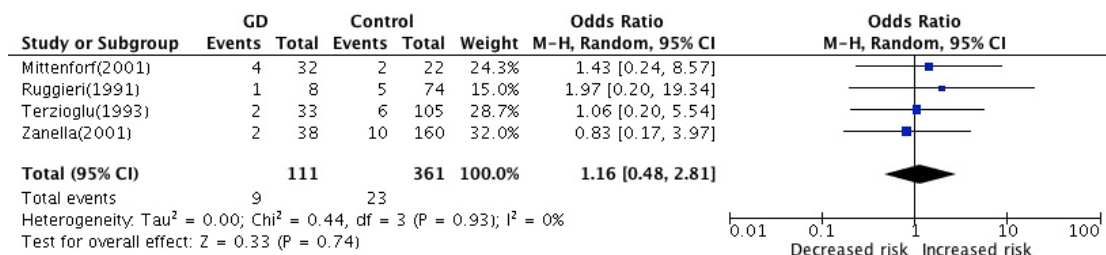

### S3.3 Sensitivity analysis excluding studies with unclearly defined GD

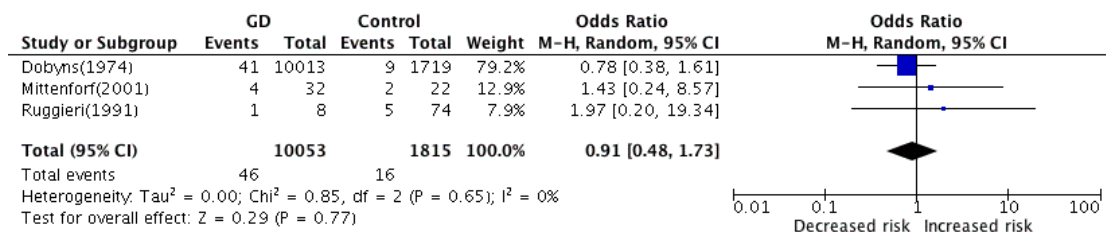

### S3.4 Overall estimates of the effects of the association of GD and thyroid carcinoma using Peto fixed-effect model.

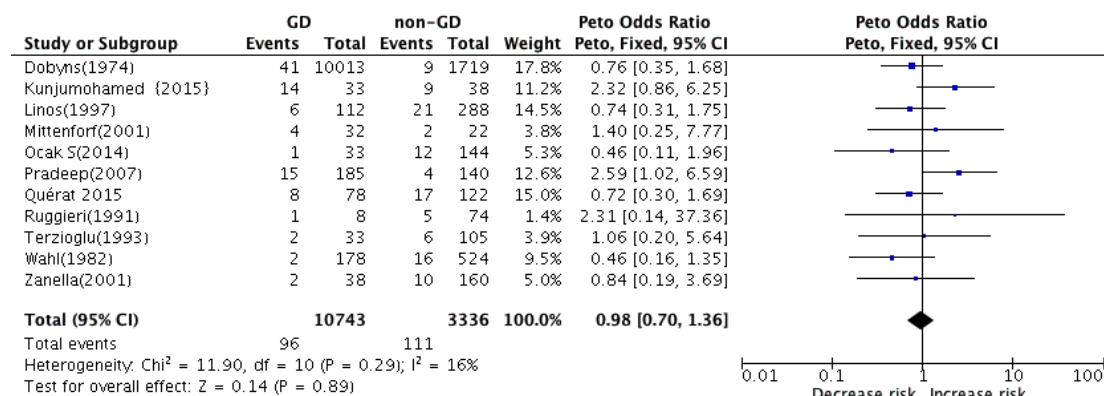

### S3.5 Overall estimates of the effects of the association of GD and thyroid carcinoma using M-H fixed-effect model.

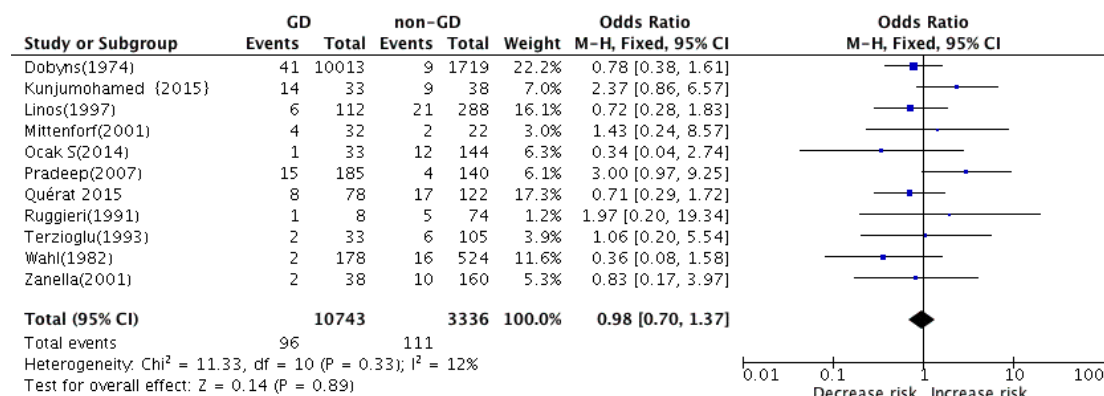

Supplement: Supplementary file 1 [file get_supplementary_file.php%3Ff%3D164210.pdf]
